# Supplementary material
Source: PubMed Central journal article supplement (PMC1838493)
Supplement: pnas_0610141104_4.pdf [file pnas_0610141104_4.pdf]

## SI Text

**Fluorescence from the Aggregates.** The steady-state fluorescence spectrum obtained with 313-nm excitation showed a very weak new band at  $\approx 350$  nm (Fig. 4 and SI Fig. 10), which is red-shifted by  $\approx 30$  nm from the  $F_1$  band due to monomer fluorescence. The peak wavelength (350 nm) of the new band is almost the same as that of the fluorescence from the dimer excited state before the proton transfer (the dimer fluorescence), which was reported in our previous time-resolved measurements (1). However, this 350-nm band in the steady-state spectrum is not assignable to the dimer fluorescence because of the following consideration of its intensity: The quantum yield of the dimer fluorescence was estimated to be more than a thousand times smaller than that of the tautomer fluorescence ( $F_2$  band) (1), whereas the intensity of the 350-nm band relative to the  $F_2$  band amounts to  $\approx 2$ -3% in Fig. 4. The 350-nm band is highly likely attributed to the aggregate species, which absorbs more in the red in the concentrated solution (2). The dimer fluorescence (before the reaction) is negligibly weak in the steady-state spectra because of its very short lifetime, and it is only noticeable in femtosecond time-resolved measurements in the UV region. We note that the contribution of this aggregate fluorescence in the time-resolved measurement is negligibly small, as readily estimated from the fluorescence lifetime and small population of the aggregate.

**Excitation Wavelength Dependence of the Fluorescence Dynamics at  $\approx 440$  nm.** As seen in SI Fig. 11, when we shifted the excitation wavelength from 313 nm to 270 nm, an ultrafast decay appeared in the time-resolved fluorescence signal at  $\approx 440$  nm. The signal originated from the 0.2-ps component of the dimer fluorescence, which spectrally extends into the visible region. Importantly, however, even with the appearance of the 0.2-ps component, the fluorescence signal in SI Fig. 11b still shows a flat feature in the time region later than 1 ps, when the 0.2-ps component completely vanishes. This result means that the decay of the 1.1-ps dimer fluorescence exactly matches the rise of the tautomer fluorescence, regardless of the appearance of the 0.2-ps component. In other words, the correspondence between the dimer and tautomer dynamics is maintained, even when the

excitation wavelength is changed. These data support our conclusion that the 0.2-ps component has no relation to the proton transfer process.

**Electronic Structure of the 7-Azaindole Dimer.** Because the relative amplitude of the 0.2-ps component reflects the excitation efficiency to the  $S_2$  state, the observed excitation wavelength dependence is correlated to the electronic structure of the 7-azaindole dimer. Here, we separate absorption spectra of the  $S_1$  and  $S_2$  states on the basis of the excitation wavelength dependence of time-resolved fluorescence and discuss the electronic structure of the excited dimer.

The initial population ratio between the  $S_1$  and  $S_2$  states can be written as  $[S_2]:[S_1] = \gamma:1 - \gamma$  by using the following extinction-coefficient ratio ( $\gamma$ ) of the two states at the excitation wavelength,

$$\gamma = \frac{\epsilon_{S_2}}{\epsilon_{S_1} + \epsilon_{S_2}} \quad [1]$$

The population dynamics starting from this initial condition is readily obtained by solving rate equations for the following relaxation scheme in the dimer:

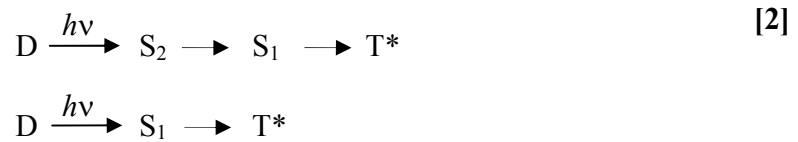

The obtained temporal behavior of the population of each excited state is expressed as

$$\begin{aligned} [S_2] &= \gamma e^{-k_1 t} \\ [S_1] &= \gamma \rho_{12} (e^{-k_2 t} - e^{-k_1 t}) + (1 - \gamma) e^{-k_2 t} \end{aligned} \quad [3]$$

where  $k_1 = \tau_1^{-1} = (0.2 \text{ ps})^{-1}$ ,  $k_2 = \tau_2^{-1} = (1.1 \text{ ps})^{-1}$ , and the  $\rho_{12}$  factor is defined as  $\rho_{12} = k_1/(k_1 - k_2) = 1.22$ . The time-resolved dimer fluorescence at 380 nm (Fig. 6) consists of the contributions from the  $S_2$  and  $S_1$  states, and it is expressed as

$$\begin{aligned}
R(t) &= a_1 [S_2] + a_2 [S_1] \\
&= A_1 e^{-k_1 t} + A_2 e^{-k_2 t} \quad ,
\end{aligned}
\tag{4}$$

where

$$\begin{aligned}
A_1 &= \gamma (a_1 - \rho_{12} a_2) \\
A_2 &= [(\rho_{12} - 1)\gamma + 1] a_2 \quad .
\end{aligned}
\tag{5}$$

The coefficient  $a_i$  is proportional to the radiative transition probability of the corresponding excited state at 380 nm, whereas the  $A_i$  value is obtainable directly from the fitting analysis of the experimental data. By taking the ratio of these two equations, we obtain the following equation:

$$\frac{A_1}{A_2} = \frac{\gamma}{(\rho_{12} - 1)\gamma + 1} \left( \frac{a_1}{a_2} - \rho_{12} \right) \quad ,
\tag{6}$$

which relates the  $\gamma$  value to the experimentally accessible  $A_1/A_2$  parameter.

A fitting procedure using Eq. 4 gave the amplitude of each component ( $A_i$ ) and, hence, the  $A_1/A_2$  factor in Eq. 6. Another unknown factor is  $a_1/a_2$ . Because this  $a_i$  value is related to the oscillator strength intrinsic to the excited state, it does not change significantly by the shift of the excitation wavelength. Therefore, we used the  $a_i$  values that were determined in our previous study undertaken with 270-nm excitation (1), which gives the ratio of  $a_1/a_2 = 1.82$ . By combining this  $a_1/a_2$  factor with the experimentally determined  $A_1/A_2$  factor in Eq. 6, we evaluated the  $\gamma$  value for all of the six excitation wavelengths (see SI Table 2).

From the  $\gamma$  value and the absorption spectrum of the dimer, which is equal to  $\epsilon_{S1} + \epsilon_{S2}$ , we determined the extinction coefficient of the  $S_1$  and  $S_2$  states separately at the six excitation wavelengths. The ‘‘separated’’ absorption spectra of the two excited states are shown in SI

Fig. 12. Although the  $S_1$  and  $S_2$  absorption bands considerably overlap with each other, the  $S_1$  absorption is slightly red-shifted and extends more in the red beyond 315 nm. It is readily seen that a shoulder structure in the dimer absorption at  $\approx 295$  nm mainly comes from the corresponding structure of the  $S_2$  absorption. This accords well with the assignment of  $S_2$  ( $^1L_b$ ) and  $S_1$  ( $^1L_a$ ), because it is typical for this class of molecules (3-5) that a broad absorption band due to the polar  $^1L_a$  state is observed near a more structured band corresponding to the less polar  $^1L_b$  state. The energy spacing between the intensity maxima of these two absorption bands is  $\approx 1,600$   $\text{cm}^{-1}$ . It is very close to the energy spacing ( $\approx 1,700$   $\text{cm}^{-1}$ ) between the intensity maxima of the  $S_1$  and  $S_2$  fluorescence spectra, which was determined in our previous study (1). We also estimated the oscillator strengths of the  $S_1$  and  $S_2$  states as  $\approx 0.06$  and  $0.1$ , respectively, by the spectral integration of the two absorption intensities over the 250- to 320-nm region. (These oscillator strengths are normalized for one 7-azaindole molecule in the dimer.) These values are in a fairly good agreement with the values obtained from the fluorescence data previously ( $0.048$  for the  $S_1$  state and  $0.13$  for the  $S_2$  state) (1).

Recently, the excited-state electronic structure of the 7-azaindole dimer was studied by a high-level quantum chemical calculation, multistate CASPT2 (6). It was shown that the first and second lowest, optically allowed transitions occur at wavelengths of 317 nm ( $^1L_a$ -type state) and 273 nm ( $^1L_b$ -type state), respectively, at the geometry optimized for the ground state. The oscillator strengths of these  $^1L_a$  and  $^1L_b$  states were reported to be  $0.143$  and  $0.237$ , respectively. (Note that these calculated oscillator strengths are the values for two 7-azaindole molecules in the dimer.) Although the calculated excitation energies of these two states and their energy gap show some deviations from the spectra shown in SI Fig. 12, it is remarkable that the relative ordering of the  $^1L_a$  and  $^1L_b$  states is consistent with the present results. Moreover, the calculated oscillator strengths of the two states agree quantitatively with the experimental values ( $0.143 \sim 0.06 \times 2$  for the  $^1L_a$  state and  $0.237 \sim 0.1 \times 2$  for the  $^1L_b$  state).

The above argument further supports the concerted mechanism. Because the excited state corresponding to the 1.1-ps component has appreciable oscillator strength, it can be

populated by direct photoexcitation from the ground state. As is well known, the molecular structure (nuclear coordinate) is remained unchanged in the “instantaneous” photoexcitation process so that it is natural to consider that the molecular structure of the generated excited state is not drastically different from the ground-state structure. Therefore, the 1.1-ps component cannot be assigned to the intermediate species that has a largely different (one-proton transferred) structure from the ground-state.

1. Takeuchi S, Tahara T (1998) *J Phys Chem A* 102:7740-7753.
2. Catalan, J (2002) *J Phys Chem A* 106:6738-6742.
3. Valeur B, Weber G (1977) *Photochem Photobiol* 25:441-444.
4. Rich RL, Chen Y, Neven D, Negrerie M, Gai F, Petrich JW (1993) *J Phys Chem* 97:1781-1788.
5. Eftink MR, Selvidge LA, Callis PR, Rehms AA (1990) *J Phys Chem* 94:3469-3479.
6. Serrano-Andres L, Merchan M, Borin AC, Stalring J (2001) *Int J Quantum Chem* 84:181-191.
