# Supplementary material
Source: PubMed Central journal article supplement (PMC1838493)

Intensity (arb. units)

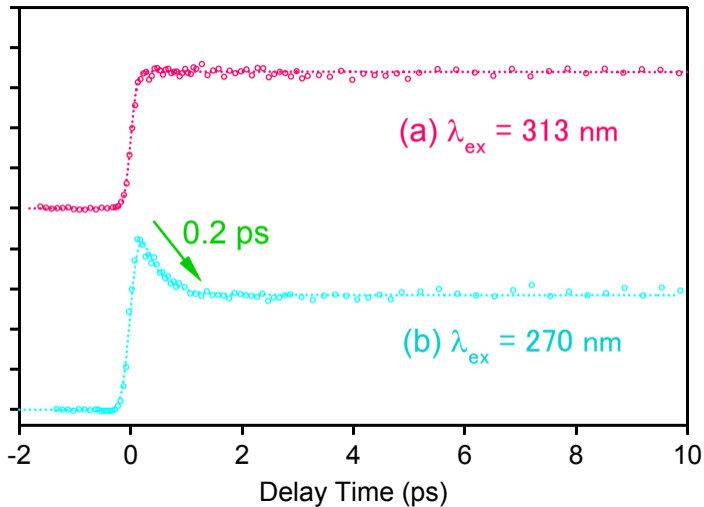

Supplement: pnas_0610141104_2.pdf [file pnas_0610141104_2.pdf]

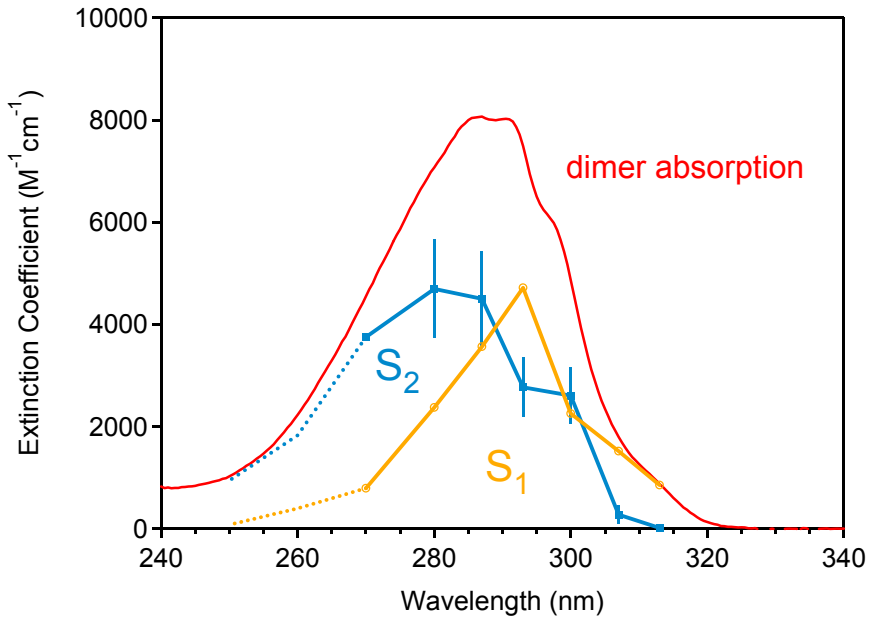

Supplement: pnas_0610141104_3.pdf [file pnas_0610141104_3.pdf]
